# Supplementary material for: SUP: a probabilistic framework to propagate genome sequence uncertainty, with applications
Source: PubMed Central journal article supplement (PMC10124968; doi:10.1093/nargab/lqad038), 2023-04-24
Supplement: lqad038_supplemental_file.pdf [file lqad038_supplemental_file.pdf]

# Supplementary Material for SUP: A Probabilistic Framework to Propagate Genome Sequence Uncertainty, with Applications

David Champredon, Devan Becker, Connor Chato, Gopi Gagan, Art Poon

## **1 Accession Numbers**

The following table lists all of the NCBI SRA accession numbers used in this paper.

|            |            |            |            |             |             |
|------------|------------|------------|------------|-------------|-------------|
| ERR4085809 | ERR4890354 | ERR4892048 | ERR5064166 | ERR5082590  | SRR13021020 |
| ERR4204823 | ERR4890371 | ERR4892066 | ERR5064294 | ERR5082598  | SRR13021022 |
| ERR4305816 | ERR4890386 | ERR4892112 | ERR5064346 | ERR5082599  | SRR13021027 |
| ERR4307842 | ERR4890403 | ERR4892152 | ERR5064787 | ERR5082600  | SRR13021032 |
| ERR4440194 | ERR4890427 | ERR4892200 | ERR5064811 | ERR5082606  | SRR13021033 |
| ERR4440219 | ERR4890531 | ERR4892203 | ERR5074314 | ERR5082610  | SRR13021035 |
| ERR4440247 | ERR4890572 | ERR4892293 | ERR5076163 | ERR5082622  | SRR13021038 |
| ERR4440332 | ERR4890609 | ERR4892339 | ERR5076748 | ERR5082630  | SRR13021042 |
| ERR4440354 | ERR4890693 | ERR4892386 | ERR5077151 | ERR5082645  | SRR13021047 |
| ERR4440373 | ERR4890746 | ERR4892392 | ERR5077411 | ERR5082654  | SRR13021052 |
| ERR4440402 | ERR4890771 | ERR4892423 | ERR5077618 | ERR5082656  | SRR13021053 |
| ERR4440425 | ERR4890819 | ERR4893013 | ERR5077713 | ERR5082673  | SRR13021059 |
| ERR4440731 | ERR4890820 | ERR4893031 | ERR5077924 | ERR5082674  | SRR13021061 |
| ERR4692420 | ERR4890881 | ERR4893033 | ERR5078210 | ERR5082694  | SRR13021067 |
| ERR4692568 | ERR4890926 | ERR4893037 | ERR5078863 | ERR5082695  | SRR13021072 |
| ERR4692877 | ERR4890974 | ERR4893080 | ERR5078897 | ERR5082696  | SRR13021073 |
| ERR4692945 | ERR4891001 | ERR4893138 | ERR5079000 | ERR5082700  | SRR13021077 |
| ERR4693014 | ERR4891011 | ERR4893184 | ERR5079423 | ERR5082702  | SRR13021084 |
| ERR4693019 | ERR4891037 | ERR4893186 | ERR5079699 | ERR5082706  | SRR13021090 |
| ERR4693495 | ERR4891061 | ERR4893197 | ERR5080131 | ERR5082708  | SRR13021093 |
| ERR4693801 | ERR4891103 | ERR4893242 | ERR5080159 | ERR5082710  | SRR13021097 |
| ERR4693865 | ERR4891178 | ERR4893353 | ERR5080327 | ERR5082711  | SRR13021098 |
| ERR4694010 | ERR4891235 | ERR4893393 | ERR5080504 | ERR5082712  | SRR13021099 |
| ERR4694330 | ERR4891238 | ERR4999251 | ERR5080893 | SRR11433882 | SRR13021104 |
| ERR4694380 | ERR4891261 | ERR4999255 | ERR5080897 | SRR11433888 | SRR13021107 |
| ERR4694400 | ERR4891304 | ERR4999275 | ERR5080913 | SRR11433893 | SRR13021109 |
| ERR4694498 | ERR4891415 | ERR4999282 | ERR5080918 | SRR12639958 | SRR13021111 |
| ERR4694556 | ERR4891433 | ERR5060778 | ERR5081077 | SRR12639961 | SRR13021113 |
| ERR4694571 | ERR4891444 | ERR5062004 | ERR5081293 | SRR12749715 | SRR13021115 |
| ERR4694617 | ERR4891493 | ERR5062062 | ERR5081301 | SRR12749716 | SRR13021124 |
| ERR4759453 | ERR4891497 | ERR5062388 | ERR5081304 | SRR12762573 | SRR13021130 |
| ERR4869446 | ERR4891532 | ERR5062514 | ERR5081316 | SRR13020989 | SRR13021131 |
| ERR4869458 | ERR4891572 | ERR5062571 | ERR5081322 | SRR13020990 | SRR13021133 |
| ERR4869480 | ERR4891675 | ERR5062648 | ERR5081836 | SRR13020991 | SRR13021134 |
| ERR4869487 | ERR4891711 | ERR5062729 | ERR5082214 | SRR13020998 | SRR13021135 |
| ERR4869497 | ERR4891715 | ERR5062935 | ERR5082346 | SRR13020999 | SRR13021143 |
| ERR4890228 | ERR4891805 | ERR5063143 | ERR5082556 | SRR13021003 | SRR13092002 |
| ERR4890271 | ERR4891841 | ERR5063165 | ERR5082561 | SRR13021008 | SRR13592146 |
| ERR4890285 | ERR4891863 | ERR5063539 | ERR5082569 | SRR13021010 |             |
| ERR4890294 | ERR4891889 | ERR5063807 | ERR5082576 | SRR13021011 |             |
| ERR4890337 | ERR4891898 | ERR5063813 | ERR5082578 | SRR13021013 |             |
| ERR4890352 | ERR4891988 | ERR5063922 | ERR5082580 | SRR13021017 |             |

Supplementary Table 1: Accession numbers for the resampling application. The prefix ERR indicates that the sequence comes from the European Nucleotide Archive, whereas the prefix SRR indicates that it comes from the NCBI's Short Read Archive.

|            |            |            |            |            |             |
|------------|------------|------------|------------|------------|-------------|
| ERR4333012 | ERR4598849 | ERR4645575 | ERR4763502 | ERR4893972 | ERR5189526  |
| ERR4422411 | ERR4599609 | ERR4647168 | ERR4763917 | ERR4905630 | ERR5196271  |
| ERR4423341 | ERR4632053 | ERR4651160 | ERR4788047 | ERR4906265 | ERR5240413  |
| ERR4423907 | ERR4633143 | ERR4652052 | ERR4792808 | ERR4989718 | ERR5277731  |
| ERR4424340 | ERR4633439 | ERR4652877 | ERR4793403 | ERR5020396 | ERR5293387  |
| ERR4424995 | ERR4633631 | ERR4659368 | ERR4824581 | ERR5021500 | ERR5304264  |
| ERR4437121 | ERR4637060 | ERR4667806 | ERR4824816 | ERR5025790 | ERR5307708  |
| ERR4437452 | ERR4639632 | ERR4668406 | ERR4824949 | ERR5027044 | ERR5314268  |
| ERR4438147 | ERR4639682 | ERR4668440 | ERR4825023 | ERR5040813 | ERR5316846  |
| ERR4438486 | ERR4639875 | ERR4668990 | ERR4826433 | ERR5041080 | ERR5334211  |
| ERR4459703 | ERR4640333 | ERR4669218 | ERR4827255 | ERR5052912 | ERR5339018  |
| ERR4459988 | ERR4640467 | ERR4686528 | ERR4835054 | ERR5052951 | ERR5339175  |
| ERR4460366 | ERR4640673 | ERR4686632 | ERR4848811 | ERR5054027 | ERR5349715  |
| ERR4463279 | ERR4641513 | ERR4686760 | ERR4849464 | ERR5057371 | ERR5353067  |
| ERR4581201 | ERR4641559 | ERR4688435 | ERR4860936 | ERR5058153 | ERR5379217  |
| ERR4584371 | ERR4642761 | ERR4688535 | ERR4861339 | ERR5177079 | SRR12349113 |
| ERR4584814 | ERR4643065 | ERR4699831 | ERR4874605 | ERR5181042 | SRR12349131 |
| ERR4597698 | ERR4643184 | ERR4706873 | ERR4874858 | ERR5187190 |             |
| ERR4597906 | ERR4644945 | ERR4763252 | ERR4878261 | ERR5188799 |             |

Supplementary Table 2: Accession numbers used in the root-to-tip application. The prefix ERR indicates that the sequence comes from the European Nucleotide Archive, whereas the prefix SRR indicates that it comes from the NCBI's Short Read Archive.
